# Supplementary material
Source: Springer Nature journal article supplement (https://www.springermedizin.de/resource/supplementary/12958_2009_601_MOESM2_ESM.pdf/9568068)

# IVF rates

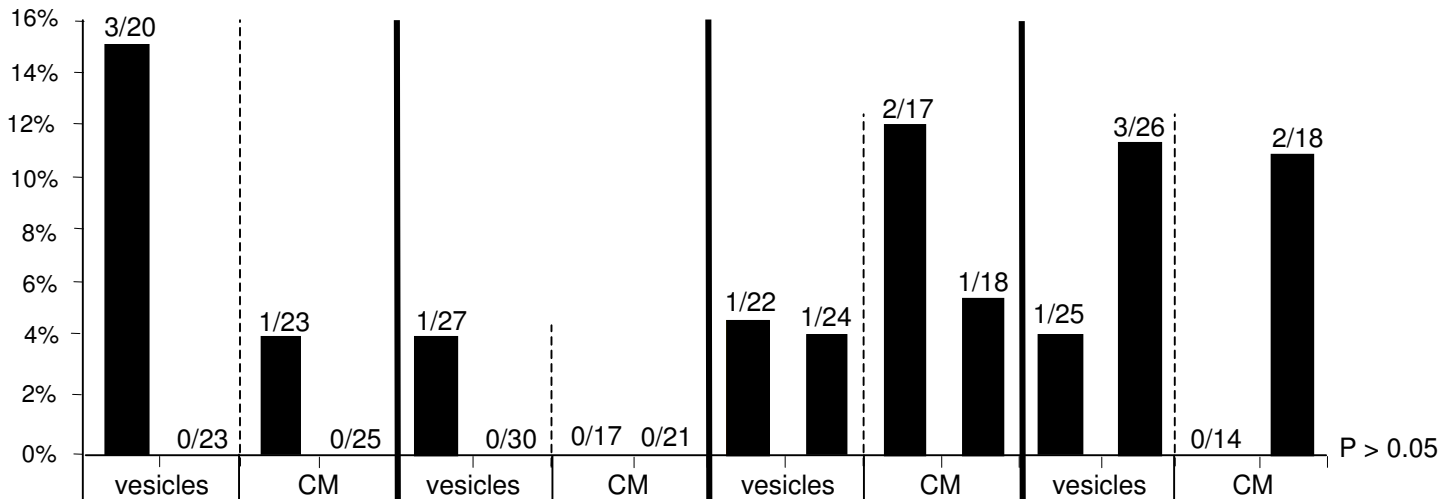

P > 0.05

LH ( $\mu\text{g ml}^{-1}$ )

hCG ( $\text{mIU ml}^{-1}$ )

E<sub>2</sub> ( $\mu\text{g ml}^{-1}$ )

0 0.1

0 0.1

0 150

0 150

0 1

0 1

0 0.1

0 0.1

Supplement: MOESM2 [file 9568068]
